# Supplementary material
Source: Springer Nature journal article supplement (https://www.springerprofessional.de/resource/supplementary/13638_2014_963_MOESM25_ESM.pdf/11898886)

# Classification Accuracy

■ Message delivery based reputation system  
■ Acknowledgement system

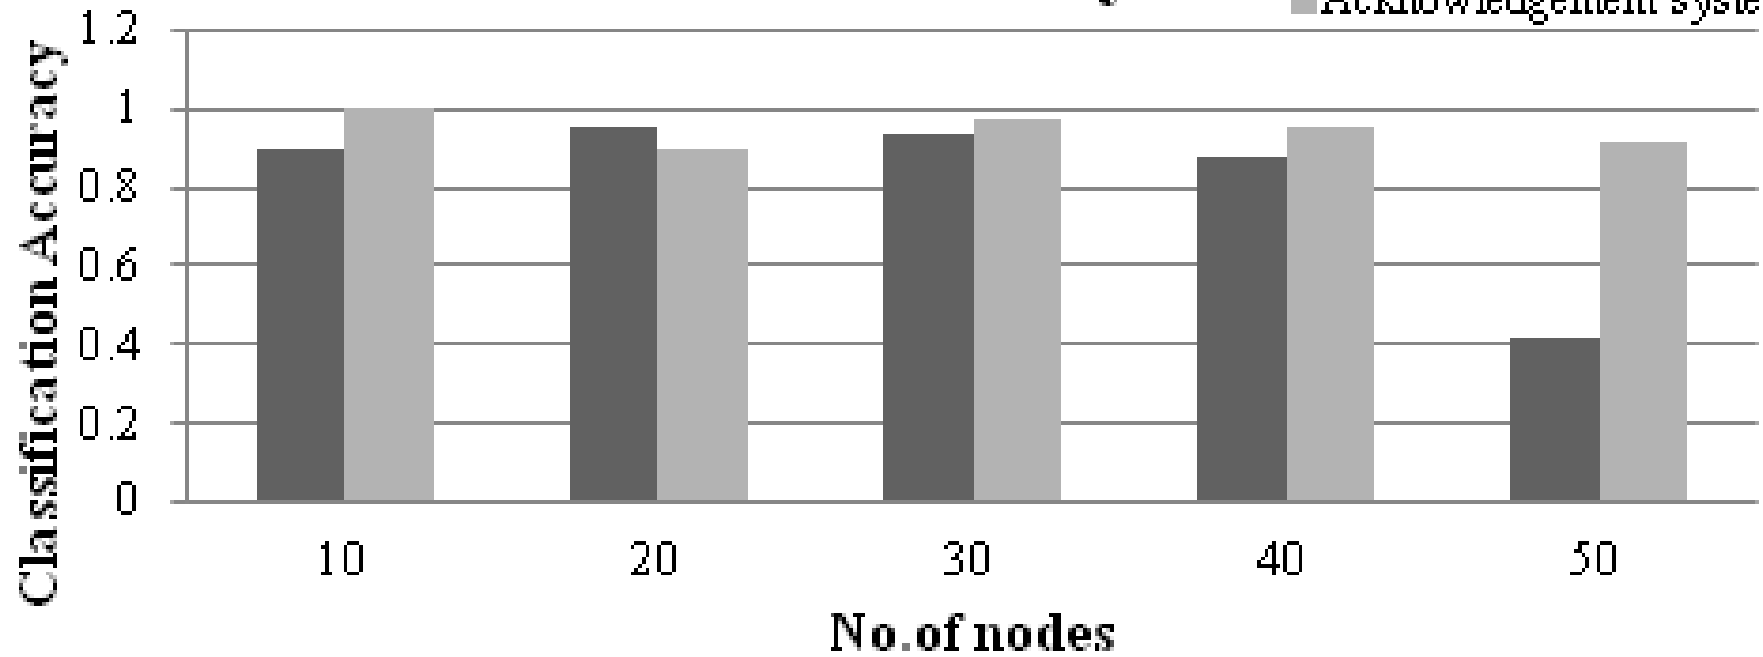

Supplement: MOESM25 [file 11898886]
